# Supplementary material for: A Predominantly Neolithic Origin for European Paternal Lineages
Source: PubMed Central journal article supplement (PMC2799514; doi:10.1371/journal.pbio.1000285), 2010-01-19
Supplement: pbio.1000285.s001.pdf [file pbio.1000285.s001.pdf]

Table S1: Haplotype data

| Population | All analyses? | DYS19 | DYS388 | DYS389I | DYS389b | DYS390 | DYS391 | DYS392 | DYS393 | DYS439 |
|------------|---------------|-------|--------|---------|---------|--------|--------|--------|--------|--------|
| DK         | y             | 14    | 12     | 13      | 15      | 23     | 11     | 14     | 13     | 19     |
| DK         | y             | 14    | 12     | 13      | 16      | 24     | 11     | 13     | 13     | 18     |
| DK         | y             | 14    | 12     | 14      | 16      | 24     | 10     | 13     | 13     | 20     |
| DK         | y             | 14    | 12     | 13      | 16      | 24     | 12     | 13     | 13     | 18     |
| DK         | y             | 14    | 12     | 13      | 16      | 24     | 11     | 13     | 12     | 19     |
| DK         | y             | 14    | 12     | 12      | 16      | 23     | 11     | 13     | 13     | 19     |
| DK         | y             | 14    | 12     | 13      | 16      | 24     | 10     | 13     | 14     | 19     |
| DK         | y             | 14    | 12     | 13      | 16      | 25     | 11     | 13     | 13     | 19     |
| DK         | y             | 14    | 12     | 13      | 16      | 23     | 10     | 13     | 13     | 19     |
| DK         | y             | 14    | 12     | 13      | 17      | 25     | 11     | 13     | 13     | 19     |
| DK         | y             | 14    | 12     | 14      | 15      | 23     | 11     | 13     | 13     | 18     |
| DK         | y             | 14    | 12     | 12      | 16      | 23     | 11     | 13     | 13     | 19     |
| DK         | y             | 14    | 12     | 13      | 16      | 24     | 11     | 13     | 13     | 20     |
| DK         | y             | 14    | 12     | 13      | 17      | 23     | 10     | 13     | 13     | 19     |
| DK         | y             | 14    | 12     | 13      | 16      | 23     | 11     | 13     | 13     | 19     |
| DK         | y             | 14    | 12     | 13      | 16      | 23     | 11     | 13     | 13     | 18     |
| DK         | y             | 14    | 12     | 13      | 15      | 23     | 12     | 13     | 13     | 18     |
| DK         | y             | 14    | 12     | 14      | 16      | 24     | 11     | 13     | 13     | 19     |
| DK         | y             | 15    | 12     | 13      | 15      | 25     | 10     | 13     | 13     | 20     |
| GE1        | y             | 14    | 13     | 12      | 16      | 24     | 11     | 13     | 13     | 18     |
| GE1        | y             | 14    | 12     | 13      | 16      | 23     | 11     | 13     | 13     | 19     |
| GE1        | y             | 14    | 12     | 13      | 17      | 24     | 10     | 13     | 12     | 19     |
| GE1        | y             | 14    | 12     | 13      | 16      | 24     | 11     | 14     | 13     | 19     |
| GE1        | y             | 14    | 12     | 13      | 16      | 23     | 11     | 13     | 13     | 19     |
| GE1        | y             | 14    | 12     | 13      | 16      | 24     | 10     | 14     | 14     | 19     |
| GE1        | y             | 14    | 12     | 13      | 16      | 24     | 11     | 13     | 14     | 20     |
| GE1        | y             | 15    | 12     | 13      | 16      | 23     | 11     | 13     | 13     | 19     |
| GE1        | y             | 14    | 12     | 12      | 17      | 23     | 11     | 13     | 13     | 18     |
| GE1        | y             | 15    | 12     | 13      | 16      | 25     | 11     | 13     | 12     | 19     |
| GE1        | y             | 15    | 12     | 14      | 16      | 24     | 11     | 13     | 12     | 19     |
| GE1        | y             | 14    | 12     | 13      | 16      | 23     | 10     | 13     | 13     | 19     |
| GE1        | y             | 14    | 12     | 12      | 19      | 24     | 11     | 13     | 12     | 19     |
| GE1        | y             | 14    | 12     | 13      | 17      | 24     | 11     | 13     | 12     | 19     |
| GE1        | y             | 14    | 12     | 13      | 16      | 24     | 10     | 13     | 13     | 18     |
| GE1        | y             | 15    | 12     | 13      | 16      | 24     | 10     | 13     | 13     | 19     |
| GE1        | y             | 15    | 12     | 12      | 15      | 24     | 10     | 13     | 13     | 18     |
| GE1        | y             | 14    | 12     | 13      | 16      | 24     | 11     | 13     | 13     | 19     |
| GE1        | y             | 14    | 12     | 13      | 16      | 23     | 11     | 13     | 12     | 21     |
| NL         | y             | 14    | 12     | 14      | 16      | 24     | 10     | 13     | 13     | 19     |
| NL         | y             | 14    | 12     | 13      | 15      | 23     | 10     | 13     | 13     | 18     |
| NL         | y             | 14    | 12     | 13      | 17      | 24     | 10     | 15     | 13     | 20     |
| NL         | y             | 14    | 12     | 13      | 15      | 23     | 11     | 13     | 13     | 18     |
| NL         | y             | 14    | 12     | 13      | 16      | 24     | 11     | 13     | 13     | 19     |
| NL         | y             | 14    | 12     | 14      | 16      | 24     | 11     | 13     | 13     | 19     |
| NL         | y             | 13    | 12     | 13      | 15      | 23     | 12     | 13     | 13     | 18     |
| NL         | y             | 14    | 12     | 14      | 16      | 23     | 11     | 13     | 13     | 18     |
| NL         | y             | 14    | 12     | 13      | 17      | 24     | 11     | 13     | 13     | 20     |
| NL         | y             | 14    | 12     | 13      | 16      | 24     | 11     | 13     | 14     | 19     |
| NL         | y             | 14    | 12     | 13      | 15      | 24     | 10     | 13     | 13     | 20     |
| NL         | y             | 14    | 12     | 13      | 17      | 26     | 10     | 13     | 13     | 20     |
| NL         | y             | 14    | 12     | 13      | 16      | 23     | 10     | 13     | 13     | 18     |
| NL         | y             | 14    | 12     | 12      | 16      | 24     | 10     | 13     | 13     | 19     |
| NL         | y             | 14    | 12     | 13      | 16      | 24     | 10     | 13     | 13     | 19     |
| NL         | y             | 14    | 12     | 13      | 16      | 24     | 11     | 13     | 13     | 19     |
| NL         | y             | 14    | 12     | 13      | 16      | 23     | 12     | 13     | 13     | 19     |
| NL         | y             | 15    | 12     | 13      | 15      | 24     | 10     | 13     | 14     | 18     |
| NL         | y             | 15    | 12     | 13      | 16      | 24     | 11     | 13     | 13     | 18     |
| NL         | y             | 14    | 12     | 13      | 16      | 24     | 11     | 13     | 13     | 19     |
| NL         | y             | 14    | 12     | 14      | 15      | 23     | 11     | 13     | 13     | 19     |
| NL         | y             | 14    | 12     | 14      | 16      | 23     | 10     | 13     | 13     | 20     |
| NL         | y             | 14    | 12     | 13      | 16      | 25     | 10     | 14     | 12     | 19     |
| NL         | y             | 14    | 12     | 13      | 16      | 23     | 11     | 13     | 13     | 19     |
| NL         | y             | 14    | 12     | 13      | 15      | 23     | 12     | 13     | 13     | 20     |
| NL         | y             | 14    | 12     | 12      | 16      | 24     | 11     | 13     | 13     | 19     |
| NL         | y             | 14    | 12     | 13      | 16      | 23     | 11     | 13     | 12     | 18     |
| NL         | y             | 14    | 12     | 13      | 17      | 25     | 10     | 13     | 12     | 18     |
| NL         | y             | 14    | 12     | 13      | 16      | 24     | 11     | 13     | 13     | 19     |
| NL         | y             | 14    | 12     | 13      | 16      | 24     | 11     | 13     | 13     | 19     |
| NL         | y             | 14    | 12     | 13      | 15      | 23     | 11     | 13     | 13     | 18     |
| NL         | y             | 14    | 12     | 13      | 16      | 25     | 10     | 13     | 13     | 19     |
| NL         | y             | 14    | 12     | 13      | 16      | 25     | 11     | 13     | 13     | 19     |
| NL         | y             | 14    | 12     | 13      | 14      | 24     | 11     | 13     | 13     | 19     |
| IT2        | y             | 15    | 12     | 13      | 16      | 23     | 10     | 13     | 13     | 20     |
| IT2        | y             | 14    | 12     | 13      | 17      | 25     | 11     | 13     | 13     | 19     |
| IT2        | y             | 14    | 11     | 13      | 16      | 24     | 10     | 15     | 13     | 19     |
| IT2        | y             | 14    | 12     | 13      | 16      | 23     | 11     | 13     | 14     | 19     |
| IT2        | y             | 14    | 12     | 13      | 16      | 24     | 10     | 13     | 13     | 19     |
| IT2        | y             | 14    | 12     | 12      | 16      | 24     | 10     | 13     | 13     | 20     |
| IT2        | y             | 14    | 12     | 14      | 16      | 24     | 11     | 13     | 13     | 18     |
| IT2        | y             | 14    | 12     | 13      | 16      | 23     | 11     | 13     | 13     | 20     |
| IT2        | y             | 14    | 12     | 13      | 16      | 24     | 11     | 13     | 13     | 19     |
| IT2        | y             | 14    | 13     | 13      | 16      | 24     | 11     | 13     | 13     | 19     |
| IT2        | y             | 15    | 12     | 13      | 16      | 23     | 10     | 13     | 13     | 19     |
| IT2        | y             | 14    | 12     | 13      | 16      | 24     | 11     | 13     | 13     | 20     |
| IT2        | y             | 14    | 12     | 13      | 16      | 23     | 11     | 13     | 13     | 19     |
| IT2        | y             | 14    | 12     | 13      | 16      | 24     | 11     | 13     | 13     | 19     |
| IT2        | y             | 14    | 12     | 13      | 16      | 24     | 11     | 13     | 13     | 19     |
| IT1        | y             | 14    | 12     | 13      | 16      | 23     | 10     | 13     | 13     | 18     |
| IT1        | y             | 14    | 12     | 13      | 16      | 25     | 11     | 13     | 14     | 19     |
| IT1        | y             | 14    | 12     | 13      | 16      | 23     | 10     | 13     | 13     | 19     |
| IT1        | y             | 14    | 12     | 13      | 16      | 24     | 11     | 13     | 13     | 19     |
| IT1        | y             | 13    | 12     | 13      | 16      | 23     | 10     | 13     | 13     | 20     |
| IT1        | y             | 14    | 12     | 13      | 17      | 25     | 11     | 13     | 14     | 19     |
| IT1        | y             | 14    | 12     | 13      | 16      | 24     | 11     | 13     | 13     | 20     |
| IT1        | y             | 14    | 12     | 13      | 16      | 23     | 9      | 13     | 13     | 18     |
| IT1        | y             | 14    | 12     | 13      | 16      | 25     | 10     | 13     | 13     | 19     |
| IT1        | y             | 14    | 12     | 13      | 16      | 23     | 10     | 13     | 13     | 18     |
| IT1        | y             | 14    | 12     | 13      | 16      | 25     | 10     | 13     | 13     | 19     |

Table S1: Haplotype data

| Population | All analyses? | DYS19 | DYS388 | DYS389I | DYS389b | DYS390 | DYS391 | DYS392 | DYS393 | DYS439 |
|------------|---------------|-------|--------|---------|---------|--------|--------|--------|--------|--------|
| IT1        | y             | 14    | 12     | 13      | 16      | 23     | 11     | 13     | 13     | 19     |
| IT1        | y             | 14    | 12     | 13      | 16      | 23     | 10     | 13     | 13     | 18     |
| IT1        | y             | 14    | 12     | 13      | 16      | 23     | 10     | 13     | 13     | 18     |
| IT1        | y             | 14    | 12     | 13      | 16      | 24     | 10     | 13     | 13     | 19     |
| IT1        | y             | 14    | 12     | 13      | 16      | 25     | 10     | 13     | 13     | 19     |
| IT1        | y             | 14    | 12     | 13      | 16      | 23     | 11     | 13     | 13     | 18     |
| IT1        | y             | 14    | 12     | 13      | 16      | 25     | 11     | 13     | 13     | 19     |
| IT1        | y             | 14    | 12     | 13      | 17      | 21     | 12     | 13     | 13     | 19     |
| IT1        | y             | 14    | 12     | 13      | 17      | 23     | 10     | 13     | 13     | 18     |
| IT1        | y             | 14    | 12     | 13      | 16      | 23     | 10     | 13     | 13     | 18     |
| IT1        | y             | 14    | 12     | 13      | 16      | 25     | 12     | 13     | 13     | 20     |
| IT1        | y             | 14    | 12     | 14      | 16      | 23     | 10     | 13     | 13     | 18     |
| IT1        | y             | 14    | 12     | 12      | 17      | 24     | 11     | 13     | 13     | 19     |
| IT1        | y             | 14    | 12     | 12      | 16      | 23     | 11     | 13     | 13     | 18     |
| IT1        | y             | 14    | 12     | 13      | 17      | 23     | 12     | 13     | 13     | 19     |
| IT1        | y             | 14    | 12     | 13      | 16      | 23     | 10     | 13     | 13     | 18     |
| IT1        | y             | 14    | 12     | 13      | 16      | 25     | 9      | 13     | 12     | 19     |
| IT1        | y             | 14    | 12     | 13      | 16      | 23     | 10     | 13     | 13     | 18     |
| IT1        | y             | 14    | 12     | 13      | 16      | 24     | 11     | 13     | 13     | 19     |
| IT1        | y             | 14    | 12     | 13      | 16      | 25     | 11     | 13     | 12     | 19     |
| IT1        | y             | 14    | 12     | 13      | 16      | 24     | 11     | 13     | 13     | 19     |
| IT1        | y             | 14    | 12     | 13      | 16      | 23     | 11     | 13     | 13     | 19     |
| IT1        | y             | 14    | 15     | 13      | 16      | 24     | 11     | 13     | 12     | 20     |
| IT1        | y             | 14    | 13     | 13      | 17      | 24     | 10     | 13     | 13     | 19     |
| IT1        | y             | 14    | 15     | 13      | 16      | 24     | 11     | 13     | 12     | 21     |
| IT1        | y             | 14    | 12     | 13      | 16      | 23     | 11     | 13     | 13     | 19     |
| IT1        | y             | 14    | 12     | 13      | 16      | 25     | 10     | 13     | 14     | 19     |
| IT1        | y             | 14    | 12     | 14      | 17      | 24     | 10     | 13     | 13     | 20     |
| IT1        | y             | 14    | 12     | 13      | 17      | 24     | 10     | 13     | 13     | 19     |
| IT1        | y             | 14    | 12     | 13      | 17      | 24     | 10     | 13     | 13     | 19     |
| IT1        | y             | 14    | 12     | 13      | 17      | 24     | 10     | 13     | 13     | 19     |
| IT1        | y             | 14    | 12     | 13      | 16      | 24     | 11     | 13     | 13     | 19     |
| IT1        | y             | 14    | 12     | 14      | 16      | 24     | 11     | 13     | 13     | 20     |
| IT1        | y             | 14    | 12     | 13      | 16      | 24     | 11     | 13     | 13     | 19     |
| IT1        | y             | 14    | 12     | 13      | 16      | 24     | 11     | 14     | 13     | 19     |
| EN1        | y             | 14    | 12     | 13      | 16      | 24     | 10     | 13     | 13     | 19     |
| EN1        | y             | 14    | 12     | 13      | 16      | 23     | 11     | 13     | 13     | 19     |
| EN1        | y             | 14    | 12     | 13      | 16      | 23     | 11     | 13     | 13     | 19     |
| EN1        | y             | 14    | 12     | 12      | 16      | 23     | 11     | 13     | 14     | 20     |
| EN1        | y             | 15    | 12     | 13      | 16      | 24     | 11     | 13     | 13     | 20     |
| EN1        | y             | 14    | 12     | 13      | 16      | 24     | 11     | 13     | 13     | 19     |
| EN1        | y             | 14    | 12     | 13      | 16      | 24     | 10     | 13     | 13     | 19     |
| EN1        | y             | 14    | 12     | 12      | 16      | 24     | 11     | 13     | 13     | 19     |
| EN1        | y             | 14    | 12     | 14      | 16      | 24     | 11     | 13     | 13     | 19     |
| EN1        | y             | 14    | 12     | 13      | 16      | 23     | 11     | 13     | 13     | 20     |
| EN1        | y             | 14    | 12     | 14      | 16      | 25     | 11     | 13     | 13     | 19     |
| EN1        | y             | 14    | 12     | 13      | 16      | 24     | 11     | 13     | 13     | 18     |
| EN1        | y             | 14    | 12     | 14      | 16      | 24     | 11     | 13     | 13     | 19     |
| EN1        | y             | 14    | 12     | 13      | 16      | 24     | 11     | 13     | 14     | 19     |
| EN1        | y             | 14    | 12     | 15      | 16      | 23     | 11     | 13     | 13     | 19     |
| EN1        | y             | 14    | 12     | 13      | 17      | 24     | 11     | 13     | 13     | 20     |
| EN1        | y             | 14    | 12     | 13      | 16      | 24     | 11     | 13     | 13     | 18     |
| EN1        | y             | 14    | 12     | 13      | 16      | 23     | 11     | 13     | 13     | 20     |
| EN1        | y             | 14    | 12     | 14      | 16      | 24     | 11     | 13     | 13     | 19     |
| EN1        | y             | 14    | 12     | 13      | 17      | 24     | 11     | 13     | 13     | 19     |
| EN1        | y             | 14    | 12     | 13      | 16      | 24     | 11     | 13     | 13     | 19     |
| EN1        | y             | 14    | 12     | 14      | 16      | 24     | 11     | 13     | 13     | 19     |
| EN1        | y             | 14    | 12     | 13      | 16      | 23     | 11     | 13     | 13     | 19     |
| EN1        | y             | 14    | 12     | 13      | 16      | 23     | 11     | 13     | 13     | 18     |
| EN1        | y             | 14    | 12     | 14      | 16      | 23     | 11     | 13     | 13     | 19     |
| EN1        | y             | 14    | 12     | 14      | 16      | 23     | 11     | 13     | 13     | 19     |
| EN1        | y             | 14    | 12     | 12      | 17      | 24     | 11     | 13     | 13     | 19     |
| EN1        | y             | 14    | 12     | 13      | 16      | 24     | 11     | 13     | 13     | 19     |
| EN1        | y             | 14    | 12     | 13      | 16      | 24     | 11     | 13     | 13     | 19     |
| EN1        | y             | 14    | 12     | 13      | 16      | 24     | 11     | 13     | 13     | 19     |
| EN1        | y             | 14    | 12     | 13      | 16      | 24     | 11     | 13     | 13     | 19     |
| EN1        | y             | 14    | 12     | 13      | 17      | 24     | 11     | 13     | 13     | 19     |
| EN1        | y             | 14    | 12     | 13      | 16      | 24     | 10     | 13     | 13     | 21     |
| EN1        | y             | 14    | 12     | 13      | 17      | 23     | 11     | 13     | 12     | 20     |
| EN1        | y             | 14    | 12     | 14      | 16      | 26     | 11     | 13     | 12     | 19     |
| EN1        | y             | 14    | 11     | 13      | 16      | 23     | 11     | 13     | 13     | 18     |
| EN1        | y             | 14    | 12     | 14      | 16      | 23     | 10     | 13     | 13     | 19     |
| EN1        | y             | 14    | 12     | 13      | 16      | 24     | 11     | 13     | 14     | 19     |
| EN1        | y             | 14    | 12     | 13      | 16      | 24     | 10     | 13     | 13     | 20     |
| EN1        | y             | 14    | 12     | 13      | 16      | 24     | 11     | 13     | 13     | 19     |
| EN1        | y             | 14    | 12     | 13      | 18      | 23     | 11     | 13     | 13     | 19     |
| FR7        | y             | 14    | 12     | 13      | 17      | 24     | 10     | 13     | 13     | 19     |
| FR7        | y             | 14    | 12     | 13      | 16      | 24     | 10     | 13     | 14     | 19     |
| FR7        | y             | 14    | 12     | 14      | 15      | 24     | 12     | 13     | 13     | 20     |
| FR7        | y             | 13    | 12     | 13      | 16      | 23     | 11     | 13     | 13     | 18     |
| FR7        | y             | 14    | 12     | 13      | 16      | 24     | 11     | 13     | 13     | 19     |
| FR7        | y             | 14    | 12     | 13      | 16      | 24     | 11     | 13     | 13     | 19     |
| FR7        | y             | 14    | 12     | 13      | 17      | 24     | 11     | 13     | 13     | 18     |
| FR7        | y             | 14    | 12     | 13      | 16      | 24     | 11     | 13     | 13     | 20     |
| FR7        | y             | 15    | 13     | 13      | 16      | 25     | 12     | 12     | 13     | 19     |
| FR7        | y             | 15    | 13     | 13      | 17      | 24     | 10     | 13     | 13     | 19     |
| FR7        | y             | 14    | 12     | 13      | 16      | 24     | 11     | 13     | 13     | 20     |
| FR7        | y             | 14    | 12     | 13      | 16      | 24     | 11     | 13     | 13     | 19     |
| FR7        | y             | 14    | 12     | 13      | 16      | 24     | 11     | 13     | 13     | 19     |

Table S1: Haplotype data

| Population | All analyses? | DYS19 | DYS388 | DYS389I | DYS389b | DYS390 | DYS391 | DYS392 | DYS393 | DYS439 |
|------------|---------------|-------|--------|---------|---------|--------|--------|--------|--------|--------|
| FR7        | y             | 14    | 12     | 13      | 16      | 24     | 10     | 13     | 13     | 19     |
| FR7        | y             | 15    | 12     | 13      | 17      | 23     | 11     | 13     | 13     | 20     |
| FR7        | y             | 15    | 12     | 13      | 17      | 23     | 11     | 13     | 13     | 20     |
| FR7        | y             | 14    | 12     | 13      | 17      | 24     | 10     | 13     | 13     | 19     |
| FR7        | y             | 14    | 12     | 13      | 16      | 23     | 10     | 13     | 13     | 19     |
| FR7        | y             | 14    | 12     | 13      | 18      | 25     | 11     | 13     | 13     | 19     |
| FR7        | y             | 14    | 12     | 13      | 17      | 24     | 11     | 13     | 13     | 19     |
| FR7        | y             | 14    | 12     | 13      | 17      | 24     | 11     | 13     | 13     | 19     |
| FR7        | y             | 13    | 12     | 13      | 17      | 24     | 11     | 13     | 14     | 19     |
| FR7        | y             | 14    | 12     | 14      | 16      | 24     | 11     | 13     | 13     | 18     |
| FR7        | y             | 14    | 12     | 13      | 16      | 24     | 11     | 12     | 14     | 18     |
| FR7        | y             | 14    | 12     | 13      | 17      | 24     | 11     | 13     | 14     | 18     |
| FR7        | y             | 14    | 12     | 13      | 16      | 24     | 11     | 13     | 13     | 19     |
| FR7        | y             | 14    | 12     | 13      | 18      | 25     | 11     | 13     | 13     | 19     |
| FR7        | y             | 14    | 12     | 14      | 16      | 25     | 10     | 13     | 13     | 19     |
| FR7        | y             | 14    | 12     | 13      | 16      | 24     | 11     | 13     | 13     | 20     |
| FR7        | y             | 14    | 12     | 13      | 17      | 24     | 10     | 13     | 13     | 19     |
| FR7        | y             | 14    | 12     | 13      | 16      | 24     | 10     | 13     | 13     | 18     |
| FR7        | y             | 15    | 12     | 13      | 16      | 24     | 11     | 13     | 13     | 18     |
| FR7        | y             | 14    | 12     | 13      | 16      | 24     | 10     | 13     | 13     | 18     |
| FR3        | y             | 14    | 12     | 13      | 17      | 24     | 10     | 13     | 13     | 19     |
| FR3        | y             | 14    | 12     | 14      | 16      | 24     | 10     | 14     | 13     | 19     |
| FR3        | y             | 14    | 12     | 13      | 17      | 24     | 11     | 13     | 12     | 19     |
| FR3        | y             | 14    | 12     | 13      | 16      | 24     | 10     | 14     | 13     | 21     |
| FR3        | y             | 14    | 12     | 13      | 16      | 24     | 11     | 13     | 13     | 18     |
| FR3        | y             | 15    | 12     | 13      | 16      | 25     | 10     | 13     | 14     | 19     |
| FR3        | y             | 16    | 12     | 13      | 16      | 24     | 10     | 13     | 13     | 19     |
| FR3        | y             | 14    | 12     | 13      | 16      | 24     | 10     | 13     | 13     | 19     |
| FR3        | y             | 14    | 12     | 13      | 16      | 24     | 10     | 13     | 13     | 19     |
| FR3        | y             | 14    | 12     | 13      | 16      | 24     | 11     | 14     | 13     | 19     |
| FR3        | y             | 14    | 12     | 13      | 16      | 24     | 10     | 13     | 13     | 19     |
| FR3        | y             | 14    | 12     | 14      | 16      | 24     | 10     | 13     | 13     | 20     |
| FR3        | y             | 14    | 12     | 12      | 16      | 24     | 11     | 13     | 13     | 18     |
| FR3        | y             | 14    | 12     | 15      | 17      | 23     | 10     | 13     | 14     | 19     |
| FR3        | y             | 14    | 12     | 13      | 16      | 22     | 11     | 13     | 13     | 18     |
| FR3        | y             | 14    | 12     | 13      | 16      | 24     | 11     | 13     | 12     | 19     |
| FR3        | y             | 14    | 12     | 13      | 15      | 24     | 11     | 13     | 13     | 19     |
| FR3        | y             | 14    | 12     | 13      | 16      | 24     | 10     | 13     | 13     | 19     |
| FR3        | y             | 14    | 12     | 13      | 17      | 24     | 11     | 13     | 12     | 19     |
| FR3        | y             | 14    | 12     | 13      | 16      | 25     | 11     | 13     | 12     | 19     |
| FR3        | y             | 15    | 12     | 13      | 16      | 24     | 10     | 13     | 13     | 19     |
| FR3        | y             | 14    | 12     | 13      | 16      | 21     | 11     | 13     | 13     | 18     |
| FR3        | y             | 14    | 13     | 14      | 16      | 24     | 11     | 13     | 13     | 20     |
| FR3        | y             | 14    | 12     | 14      | 16      | 25     | 11     | 13     | 13     | 19     |
| FR3        | y             | 14    | 12     | 13      | 17      | 24     | 10     | 13     | 13     | 18     |
| FR3        | y             | 14    | 12     | 13      | 17      | 25     | 12     | 13     | 13     | 19     |
| FR3        | y             | 14    | 12     | 13      | 16      | 23     | 11     | 15     | 13     | 19     |
| FR3        | y             | 14    | 12     | 13      | 16      | 24     | 11     | 14     | 13     | 19     |
| FR3        | y             | 14    | 12     | 13      | 16      | 24     | 11     | 13     | 13     | 19     |
| FR3        | y             | 14    | 12     | 13      | 16      | 24     | 11     | 13     | 13     | 19     |
| FR3        | y             | 14    | 12     | 12      | 17      | 24     | 11     | 13     | 13     | 19     |
| FR3        | y             | 15    | 12     | 12      | 16      | 24     | 10     | 13     | 13     | 19     |
| FR3        | y             | 14    | 13     | 14      | 16      | 24     | 11     | 13     | 13     | 20     |
| FR3        | y             | 15    | 12     | 13      | 17      | 24     | 10     | 13     | 13     | 19     |
| FR3        | y             | 14    | 12     | 13      | 16      | 24     | 10     | 13     | 13     | 20     |
| FR3        | y             | 14    | 12     | 13      | 17      | 24     | 11     | 13     | 13     | 19     |
| FR3        | y             | 15    | 12     | 13      | 16      | 24     | 11     | 13     | 13     | 19     |
| FR3        | y             | 14    | 12     | 13      | 16      | 24     | 10     | 13     | 13     | 18     |
| FR3        | y             | 14    | 12     | 13      | 16      | 24     | 10     | 13     | 13     | 19     |
| FR3        | y             | 14    | 12     | 13      | 16      | 24     | 10     | 13     | 13     | 19     |
| FR3        | y             | 14    | 12     | 13      | 16      | 24     | 11     | 13     | 13     | 19     |
| FR3        | y             | 14    | 12     | 13      | 16      | 24     | 10     | 13     | 13     | 18     |
| FR3        | y             | 14    | 12     | 13      | 16      | 24     | 10     | 13     | 13     | 19     |
| FR3        | y             | 14    | 12     | 14      | 16      | 24     | 11     | 13     | 13     | 19     |
| FR3        | y             | 14    | 12     | 13      | 17      | 24     | 11     | 13     | 13     | 19     |
| FR3        | y             | 15    | 12     | 13      | 16      | 25     | 10     | 13     | 14     | 19     |
| FR3        | y             | 14    | 12     | 13      | 16      | 23     | 11     | 14     | 13     | 20     |
| FR3        | y             | 14    | 12     | 13      | 18      | 24     | 10     | 13     | 13     | 20     |
| FR3        | y             | 16    | 12     | 13      | 17      | 24     | 12     | 13     | 14     | 18     |
| FR2        | y             | 14    | 12     | 13      | 16      | 23     | 11     | 13     | 13     | 19     |
| FR2        | y             | 14    | 12     | 14      | 16      | 23     | 11     | 11     | 13     | 19     |
| FR2        | y             | 14    | 12     | 13      | 16      | 25     | 11     | 13     | 13     | 19     |
| FR2        | y             | 14    | 12     | 13      | 16      | 24     | 10     | 13     | 14     | 19     |
| FR2        | y             | 15    | 12     | 13      | 16      | 23     | 11     | 13     | 13     | 19     |
| FR2        | y             | 14    | 12     | 12      | 16      | 23     | 10     | 13     | 13     | 19     |
| FR2        | y             | 14    | 12     | 13      | 16      | 24     | 11     | 13     | 13     | 19     |
| FR2        | y             | 14    | 12     | 13      | 16      | 25     | 10     | 14     | 13     | 20     |
| FR2        | y             | 14    | 13     | 13      | 16      | 24     | 11     | 13     | 13     | 19     |
| FR2        | y             | 15    | 12     | 13      | 18      | 24     | 11     | 12     | 12     | 19     |
| FR2        | y             | 14    | 12     | 13      | 16      | 24     | 11     | 13     | 13     | 20     |
| FR2        | y             | 14    | 12     | 13      | 16      | 24     | 11     | 13     | 13     | 19     |
| FR2        | y             | 14    | 12     | 13      | 16      | 23     | 11     | 13     | 13     | 20     |
| FR2        | y             | 14    | 12     | 14      | 17      | 24     | 10     | 13     | 12     | 19     |
| FR2        | y             | 14    | 12     | 13      | 16      | 25     | 11     | 13     | 13     | 19     |
| FR2        | y             | 14    | 12     | 12      | 15      | 24     | 10     | 13     | 13     | 20     |
| FR2        | y             | 14    | 12     | 13      | 16      | 24     | 10     | 13     | 13     | 18     |
| FR2        | y             | 14    | 12     | 13      | 16      | 23     | 11     | 13     | 13     | 18     |
| FR2        | y             | 14    | 12     | 13      | 16      | 23     | 11     | 14     | 13     | 19     |
| FR2        | y             | 14    | 12     | 13      | 16      | 24     | 10     | 13     | 13     | 19     |
| FR2        | y             | 14    | 12     | 13      | 16      | 24     | 11     | 13     | 13     | 18     |

Table S1: Haplotype data

| Population | All analyses? | DYS19 | DYS388 | DYS389I | DYS389b | DYS390 | DYS391 | DYS392 | DYS393 | DYS439 |
|------------|---------------|-------|--------|---------|---------|--------|--------|--------|--------|--------|
| FR2        | y             | 13    | 12     | 13      | 16      | 24     | 10     | 13     | 13     | 19     |
| FR2        | y             | 15    | 12     | 12      | 18      | 24     | 10     | 13     | 13     | 19     |
| FR2        | y             | 15    | 12     | 13      | 16      | 24     | 11     | 13     | 14     | 20     |
| FR2        | y             | 14    | 12     | 11      | 16      | 25     | 12     | 13     | 14     | 20     |
| FR2        | y             | 14    | 12     | 13      | 16      | 23     | 12     | 13     | 13     | 19     |
| FR2        | y             | 13    | 12     | 14      | 17      | 24     | 11     | 13     | 13     | 19     |
| EN2        | y             | 14    | 12     | 13      | 16      | 24     | 11     | 13     | 13     | 19     |
| EN2        | y             | 14    | 12     | 11      | 16      | 24     | 10     | 13     | 13     | 19     |
| EN2        | y             | 14    | 12     | 13      | 16      | 23     | 11     | 13     | 13     | 20     |
| EN2        | y             | 15    | 12     | 13      | 16      | 24     | 11     | 13     | 13     | 18     |
| EN2        | y             | 14    | 12     | 13      | 16      | 23     | 11     | 13     | 13     | 19     |
| EN2        | y             | 14    | 12     | 13      | 16      | 24     | 11     | 13     | 13     | 19     |
| EN2        | y             | 14    | 12     | 14      | 16      | 23     | 10     | 13     | 13     | 19     |
| EN2        | y             | 14    | 12     | 14      | 16      | 24     | 11     | 13     | 13     | 19     |
| EN2        | y             | 14    | 12     | 13      | 17      | 23     | 11     | 13     | 13     | 20     |
| EN2        | y             | 15    | 12     | 13      | 16      | 23     | 12     | 13     | 13     | 19     |
| EN2        | y             | 15    | 13     | 14      | 16      | 23     | 11     | 13     | 13     | 19     |
| EN2        | y             | 14    | 12     | 13      | 16      | 23     | 11     | 13     | 13     | 18     |
| EN2        | y             | 14    | 12     | 13      | 16      | 24     | 11     | 13     | 13     | 19     |
| EN2        | y             | 14    | 12     | 13      | 16      | 24     | 10     | 13     | 13     | 19     |
| EN2        | y             | 14    | 12     | 13      | 16      | 24     | 11     | 13     | 13     | 19     |
| EN2        | y             | 14    | 12     | 13      | 16      | 23     | 11     | 13     | 13     | 18     |
| EN2        | y             | 14    | 12     | 12      | 16      | 25     | 12     | 13     | 13     | 19     |
| EN2        | y             | 14    | 12     | 13      | 16      | 24     | 10     | 13     | 13     | 18     |
| EN2        | y             | 13    | 12     | 13      | 16      | 24     | 11     | 13     | 14     | 20     |
| EN2        | y             | 14    | 12     | 13      | 16      | 24     | 10     | 13     | 13     | 19     |
| EN2        | y             | 14    | 12     | 13      | 17      | 23     | 11     | 13     | 13     | 18     |
| EN2        | y             | 15    | 12     | 13      | 16      | 23     | 10     | 13     | 13     | 20     |
| EN2        | y             | 14    | 12     | 13      | 16      | 25     | 11     | 14     | 13     | 19     |
| EN2        | y             | 14    | 12     | 13      | 16      | 23     | 11     | 13     | 13     | 19     |
| EN2        | y             | 14    | 12     | 13      | 16      | 24     | 10     | 13     | 13     | 19     |
| FR1        | y             | 14    | 12     | 13      | 16      | 24     | 10     | 13     | 13     | 19     |
| FR1        | y             | 14    | 12     | 13      | 16      | 24     | 10     | 13     | 13     | 18     |
| FR1        | y             | 14    | 12     | 13      | 16      | 24     | 10     | 13     | 13     | 19     |
| FR1        | y             | 13    | 12     | 14      | 17      | 24     | 11     | 13     | 13     | 19     |
| FR1        | y             | 14    | 12     | 13      | 17      | 24     | 11     | 13     | 13     | 18     |
| FR1        | y             | 14    | 12     | 13      | 16      | 25     | 10     | 13     | 13     | 19     |
| FR1        | y             | 14    | 12     | 14      | 17      | 24     | 10     | 13     | 13     | 19     |
| FR1        | y             | 14    | 12     | 13      | 16      | 23     | 10     | 13     | 13     | 18     |
| FR1        | y             | 14    | 12     | 13      | 18      | 24     | 11     | 13     | 13     | 20     |
| FR1        | y             | 14    | 12     | 13      | 16      | 24     | 10     | 13     | 13     | 19     |
| FR1        | y             | 14    | 12     | 13      | 16      | 23     | 11     | 13     | 13     | 19     |
| FR1        | y             | 14    | 12     | 13      | 16      | 24     | 10     | 13     | 13     | 19     |
| FR1        | y             | 14    | 12     | 14      | 16      | 24     | 8      | 13     | 13     | 19     |
| FR1        | y             | 14    | 12     | 13      | 18      | 24     | 11     | 13     | 13     | 18     |
| FR1        | y             | 13    | 14     | 13      | 16      | 24     | 10     | 13     | 13     | 19     |
| FR1        | y             | 13    | 14     | 13      | 16      | 24     | 10     | 13     | 13     | 19     |
| FR1        | y             | 14    | 12     | 13      | 16      | 24     | 11     | 13     | 13     | 21     |
| FR1        | y             | 15    | 12     | 14      | 16      | 24     | 11     | 13     | 13     | 19     |
| FR1        | y             | 14    | 12     | 13      | 16      | 24     | 10     | 13     | 13     | 18     |
| FR1        | y             | 15    | 12     | 14      | 16      | 24     | 10     | 13     | 13     | 19     |
| FR1        | y             | 14    | 12     | 14      | 16      | 24     | 11     | 13     | 13     | 19     |
| FR1        | y             | 14    | 12     | 13      | 16      | 24     | 11     | 13     | 13     | 19     |
| FR1        | y             | 14    | 12     | 13      | 16      | 24     | 10     | 13     | 13     | 19     |
| FR1        | y             | 14    | 12     | 14      | 16      | 24     | 11     | 13     | 13     | 21     |
| FR1        | y             | 14    | 12     | 13      | 16      | 24     | 10     | 13     | 13     | 19     |
| FR1        | y             | 14    | 12     | 13      | 16      | 24     | 10     | 13     | 13     | 20     |
| FR1        | y             | 14    | 12     | 13      | 16      | 24     | 11     | 13     | 13     | 19     |
| FR1        | y             | 14    | 12     | 13      | 16      | 24     | 11     | 13     | 13     | 19     |
| FR1        | y             | 14    | 12     | 13      | 16      | 24     | 11     | 13     | 13     | 19     |
| FR1        | y             | 14    | 12     | 13      | 16      | 24     | 11     | 13     | 13     | 19     |
| FR1        | y             | 14    | 12     | 13      | 16      | 24     | 10     | 13     | 13     | 20     |
| FR1        | y             | 13    | 12     | 12      | 16      | 24     | 11     | 13     | 13     | 19     |
| FR1        | y             | 13    | 12     | 13      | 16      | 24     | 10     | 13     | 13     | 19     |
| FR1        | y             | 15    | 12     | 13      | 16      | 24     | 10     | 13     | 13     | 19     |
| FR1        | y             | 14    | 12     | 14      | 16      | 24     | 11     | 13     | 13     | 20     |
| FR1        | y             | 14    | 12     | 13      | 16      | 24     | 11     | 13     | 13     | 19     |
| FR1        | y             | 14    | 12     | 14      | 16      | 24     | 10     | 13     | 13     | 19     |
| FR1        | y             | 14    | 12     | 13      | 16      | 24     | 11     | 13     | 13     | 19     |
| FR1        | y             | 14    | 12     | 13      | 16      | 24     | 11     | 13     | 13     | 19     |
| FR1        | y             | 14    | 12     | 13      | 16      | 24     | 11     | 13     | 13     | 19     |
| FR1        | y             | 14    | 12     | 13      | 16      | 24     | 10     | 13     | 13     | 20     |
| FR1        | y             | 14    | 12     | 13      | 16      | 24     | 11     | 13     | 13     | 19     |
| FR1        | y             | 14    | 12     | 13      | 16      | 24     | 10     | 13     | 14     | 19     |
| FR1        | y             | 14    | 12     | 13      | 16      | 24     | 10     | 13     | 13     | 20     |
| IR         | y             | 14    | 12     | 14      | 17      | 24     | 11     | 13     | 13     | 19     |
| IR         | y             | 14    | 12     | 13      | 16      | 24     | 11     | 13     | 13     | 20     |
| IR         | y             | 14    | 12     | 14      | 16      | 24     | 11     | 13     | 13     | 19     |
| IR         | y             | 15    | 12     | 13      | 16      | 25     | 11     | 13     | 13     | 18     |
| IR         | y             | 14    | 12     | 13      | 17      | 24     | 11     | 13     | 13     | 18     |
| IR         | y             | 14    | 12     | 13      | 16      | 24     | 11     | 13     | 13     | 19     |
| IR         | y             | 14    | 12     | 14      | 17      | 24     | 10     | 13     | 13     | 19     |
| IR         | y             | 14    | 12     | 13      | 16      | 24     | 11     | 13     | 13     | 18     |
| IR         | y             | 14    | 12     | 13      | 16      | 24     | 12     | 13     | 13     | 20     |
| IR         | y             | 14    | 12     | 13      | 16      | 24     | 10     | 13     | 12     | 19     |
| IR         | y             | 14    | 12     | 13      | 16      | 24     | 11     | 13     | 13     | 18     |
| IR         | y             | 14    | 12     | 14      | 16      | 24     | 11     | 13     | 13     | 18     |
| IR         | y             | 14    | 12     | 14      | 16      | 24     | 11     | 13     | 13     | 19     |
| IR         | y             | 14    | 12     | 13      | 16      | 24     | 9      | 13     | 13     | 18     |
| IR         | y             | 14    | 12     | 13      | 16      | 25     | 11     | 13     | 13     | 19     |
| IR         | y             | 14    | 12     | 14      | 17      | 24     | 10     | 13     | 13     | 18     |
| IR         | y             | 14    | 12     | 13      | 16      | 24     | 11     | 13     | 13     | 20     |
| IR         | y             | 14    | 12     | 14      | 16      | 24     | 10     | 13     | 13     | 19     |
| IR         | y             | 14    | 12     | 13      | 17      | 24     | 10     | 13     | 13     | 19     |
| IR         | y             | 14    | 12     | 13      | 16      | 23     | 11     | 13     | 14     | 19     |
| IR         | y             | 14    | 12     | 13      | 16      | 25     | 11     | 13     | 13     | 19     |

Table S1: Haplotype data

| Population | All analyses? | DYS19 | DYS388 | DYS389I | DYS389b | DYS390 | DYS391 | DYS392 | DYS393 | DYS439 |
|------------|---------------|-------|--------|---------|---------|--------|--------|--------|--------|--------|
| IR         | y             | 14    | 12     | 13      | 15      | 23     | 10     | 13     | 13     | 18     |
| IR         | y             | 14    | 12     | 13      | 16      | 24     | 11     | 13     | 13     | 20     |
| IR         | y             | 14    | 12     | 14      | 16      | 24     | 11     | 13     | 13     | 19     |
| IR         | y             | 14    | 12     | 14      | 17      | 24     | 11     | 13     | 13     | 19     |
| IR         | y             | 15    | 12     | 13      | 15      | 23     | 12     | 13     | 13     | 18     |
| IR         | y             | 14    | 12     | 14      | 16      | 24     | 11     | 13     | 13     | 19     |
| IR         | y             | 14    | 12     | 13      | 16      | 23     | 11     | 13     | 13     | 20     |
| IR         | y             | 14    | 12     | 13      | 16      | 24     | 10     | 14     | 13     | 19     |
| IR         | y             | 14    | 12     | 13      | 15      | 23     | 10     | 13     | 13     | 19     |
| IR         | y             | 14    | 12     | 13      | 16      | 24     | 10     | 13     | 13     | 19     |
| IR         | y             | 14    | 12     | 13      | 17      | 24     | 10     | 13     | 13     | 19     |
| IR         | y             | 14    | 12     | 13      | 16      | 24     | 11     | 13     | 14     | 19     |
| IR         | y             | 14    | 12     | 13      | 15      | 23     | 11     | 13     | 13     | 19     |
| IR         | y             | 14    | 12     | 14      | 16      | 24     | 11     | 13     | 13     | 19     |
| IR         | y             | 14    | 12     | 14      | 16      | 24     | 11     | 14     | 13     | 19     |
| IR         | y             | 14    | 12     | 13      | 16      | 24     | 11     | 13     | 13     | 20     |
| IR         | y             | 14    | 12     | 13      | 17      | 24     | 11     | 13     | 13     | 19     |
| IR         | y             | 14    | 12     | 13      | 16      | 25     | 12     | 14     | 13     | 18     |
| IR         | y             | 14    | 12     | 13      | 16      | 24     | 10     | 13     | 13     | 19     |
| IR         | y             | 14    | 12     | 13      | 16      | 24     | 11     | 13     | 13     | 19     |
| IR         | y             | 14    | 12     | 13      | 16      | 24     | 10     | 13     | 13     | 19     |
| IR         | y             | 14    | 12     | 13      | 16      | 24     | 10     | 13     | 13     | 21     |
| IR         | y             | 14    | 12     | 12      | 16      | 24     | 10     | 13     | 13     | 18     |
| IR         | y             | 14    | 12     | 14      | 16      | 24     | 11     | 13     | 13     | 19     |
| IR         | y             | 14    | 12     | 13      | 16      | 24     | 10     | 15     | 13     | 21     |
| IR         | y             | 14    | 12     | 14      | 16      | 24     | 11     | 13     | 13     | 21     |
| IR         | y             | 14    | 12     | 13      | 17      | 23     | 11     | 13     | 13     | 18     |
| IR         | y             | 14    | 12     | 14      | 16      | 24     | 11     | 13     | 13     | 20     |
| IR         | y             | 14    | 12     | 14      | 16      | 25     | 11     | 13     | 14     | 19     |
| IR         | y             | 14    | 12     | 12      | 17      | 24     | 10     | 13     | 13     | 19     |
| IR         | y             | 14    | 12     | 13      | 17      | 24     | 11     | 13     | 13     | 19     |
| IR         | y             | 15    | 12     | 13      | 16      | 24     | 11     | 13     | 13     | 18     |
| IR         | y             | 14    | 12     | 13      | 16      | 25     | 11     | 13     | 13     | 19     |
| IR         | y             | 14    | 12     | 13      | 16      | 24     | 11     | 13     | 13     | 19     |
| IR         | y             | 14    | 12     | 14      | 16      | 22     | 11     | 13     | 13     | 19     |
| IR         | y             | 14    | 12     | 13      | 16      | 24     | 11     | 13     | 13     | 18     |
| IR         | y             | 14    | 12     | 13      | 16      | 25     | 11     | 13     | 13     | 19     |
| IR         | y             | 14    | 12     | 14      | 17      | 24     | 11     | 13     | 13     | 20     |
| IR         | y             | 14    | 12     | 14      | 16      | 24     | 11     | 13     | 13     | 19     |
| IR         | y             | 14    | 12     | 14      | 16      | 24     | 11     | 13     | 13     | 20     |
| IR         | y             | 14    | 12     | 13      | 16      | 24     | 10     | 13     | 13     | 20     |
| IR         | y             | 14    | 12     | 13      | 16      | 24     | 11     | 13     | 13     | 20     |
| IR         | y             | 14    | 12     | 13      | 16      | 25     | 11     | 13     | 13     | 19     |
| IR         | y             | 14    | 12     | 13      | 16      | 24     | 11     | 13     | 13     | 19     |
| IR         | y             | 14    | 12     | 13      | 16      | 24     | 11     | 13     | 13     | 19     |
| IR         | y             | 14    | 12     | 13      | 17      | 24     | 11     | 13     | 13     | 18     |
| IR         | y             | 14    | 12     | 13      | 17      | 25     | 10     | 13     | 13     | 20     |
| IR         | y             | 14    | 12     | 13      | 16      | 24     | 11     | 13     | 12     | 19     |
| IR         | y             | 14    | 12     | 13      | 17      | 24     | 10     | 13     | 13     | 19     |
| IR         | y             | 14    | 12     | 13      | 16      | 24     | 12     | 13     | 13     | 19     |
| IR         | y             | 14    | 12     | 12      | 16      | 24     | 12     | 13     | 13     | 19     |
| IR         | y             | 14    | 12     | 13      | 16      | 24     | 10     | 13     | 13     | 18     |
| IR         | y             | 14    | 12     | 14      | 16      | 24     | 11     | 13     | 13     | 18     |
| GE         | y             | 14    | 12     | 12      | 15      | 25     | 10     | 13     | 13     | 19     |
| GE         | y             | 14    | 12     | 13      | 17      | 24     | 11     | 13     | 13     | 19     |
| GE         | y             | 15    | 12     | 13      | 16      | 24     | 10     | 13     | 14     | 19     |
| GE         | y             | 14    | 12     | 13      | 16      | 24     | 11     | 13     | 13     | 19     |
| GE         | y             | 15    | 12     | 13      | 16      | 24     | 11     | 13     | 13     | 19     |
| GE         | y             | 14    | 12     | 13      | 17      | 24     | 10     | 13     | 13     | 19     |
| GE         | y             | 14    | 12     | 13      | 15      | 24     | 11     | 13     | 13     | 18     |
| GE         | y             | 15    | 12     | 14      | 16      | 24     | 11     | 13     | 13     | 20     |
| GE         | y             | 14    | 13     | 13      | 16      | 24     | 11     | 13     | 12     | 20     |
| GE         | y             | 14    | 12     | 13      | 16      | 24     | 11     | 13     | 12     | 19     |
| GE         | y             | 14    | 12     | 13      | 16      | 24     | 11     | 13     | 14     | 18     |
| GE         | y             | 14    | 12     | 13      | 18      | 25     | 10     | 13     | 13     | 19     |
| GE         | y             | 14    | 12     | 14      | 16      | 24     | 11     | 13     | 13     | 19     |
| GE         | y             | 14    | 12     | 13      | 15      | 23     | 11     | 13     | 13     | 19     |
| GE         | y             | 14    | 12     | 13      | 16      | 24     | 11     | 13     | 13     | 19     |
| GE         | y             | 14    | 12     | 13      | 16      | 23     | 11     | 13     | 13     | 19     |
| GE         | y             | 14    | 12     | 13      | 16      | 25     | 10     | 13     | 13     | 19     |
| GE         | y             | 14    | 12     | 13      | 16      | 24     | 11     | 13     | 13     | 19     |
| GE         | y             | 14    | 12     | 13      | 16      | 24     | 11     | 13     | 13     | 19     |
| GE         | y             | 14    | 12     | 13      | 16      | 24     | 11     | 13     | 13     | 20     |
| GE         | y             | 15    | 12     | 13      | 16      | 24     | 10     | 13     | 13     | 19     |
| GE         | y             | 15    | 12     | 13      | 17      | 24     | 10     | 14     | 14     | 20     |
| GE         | y             | 14    | 12     | 14      | 16      | 24     | 11     | 13     | 13     | 19     |
| GE         | y             | 15    | 12     | 13      | 16      | 24     | 10     | 13     | 13     | 20     |
| GE         | y             | 14    | 12     | 13      | 16      | 24     | 10     | 13     | 13     | 19     |
| GE         | y             | 14    | 12     | 14      | 17      | 24     | 10     | 13     | 13     | 18     |
| GE         | y             | 14    | 12     | 12      | 16      | 23     | 10     | 13     | 13     | 20     |
| GE         | y             | 14    | 12     | 13      | 16      | 23     | 11     | 13     | 13     | 19     |
| GE         | y             | 14    | 12     | 13      | 16      | 24     | 11     | 13     | 13     | 19     |
| GE         | y             | 14    | 12     | 13      | 16      | 24     | 10     | 13     | 13     | 20     |
| GE         | y             | 14    | 12     | 13      | 15      | 23     | 11     | 13     | 13     | 19     |
| GE         | y             | 14    | 12     | 13      | 18      | 23     | 11     | 13     | 13     | 20     |
| GE         | y             | 14    | 12     | 13      | 16      | 24     | 11     | 13     | 13     | 19     |
| GE         | y             | 14    | 12     | 13      | 16      | 24     | 10     | 13     | 13     | 19     |
| GE         | y             | 14    | 12     | 13      | 15      | 23     | 10     | 13     | 13     | 18     |
| GE         | y             | 14    | 12     | 13      | 16      | 24     | 11     | 13     | 13     | 19     |
| GE         | y             | 14    | 12     | 14      | 16      | 24     | 10     | 13     | 13     | 19     |
| GE         | y             | 14    | 12     | 13      | 16      | 24     | 10     | 13     | 13     | 18     |
| GE         | y             | 15    | 12     | 13      | 17      | 23     | 11     | 15     | 13     | 18     |
| GE         | y             | 14    | 12     | 13      | 16      | 23     | 11     | 13     | 14     | 19     |
| GE         | y             | 14    | 12     | 13      | 17      | 24     | 11     | 12     | 13     | 18     |
| GE         | y             | 14    | 12     | 13      | 16      | 24     | 11     | 13     | 13     | 19     |
| GE         | y             | 14    | 12     | 13      | 16      | 24     | 11     | 13     | 13     | 19     |
| GE         | y             | 14    | 12     | 13      | 16      | 24     | 10     | 13     | 13     | 20     |

Table S1: Haplotype data

| Population | All analyses? | DYS19 | DYS388 | DYS389I | DYS389b | DYS390 | DYS391 | DYS392 | DYS393 | DYS439 |
|------------|---------------|-------|--------|---------|---------|--------|--------|--------|--------|--------|
| GE         | y             | 14    | 12     | 13      | 15      | 23     | 10     | 13     | 13     | 18     |
| GE         | y             | 14    | 12     | 13      | 16      | 24     | 11     | 13     | 13     | 19     |
| GE         | y             | 14    | 12     | 13      | 15      | 23     | 10     | 13     | 13     | 21     |
| GE         | y             | 14    | 12     | 13      | 16      | 23     | 11     | 13     | 13     | 19     |
| GE         | y             | 14    | 12     | 13      | 16      | 24     | 11     | 13     | 13     | 20     |
| GE         | y             | 14    | 12     | 13      | 16      | 23     | 11     | 13     | 13     | 18     |
| GE         | y             | 14    | 12     | 13      | 17      | 25     | 10     | 13     | 13     | 19     |
| GE         | y             | 14    | 12     | 14      | 16      | 24     | 11     | 13     | 13     | 18     |
| GE         | y             | 15    | 12     | 13      | 16      | 23     | 10     | 13     | 13     | 19     |
| GE         | y             | 14    | 12     | 13      | 16      | 23     | 10     | 14     | 13     | 19     |
| GE         | y             | 13    | 12     | 13      | 16      | 23     | 11     | 13     | 13     | 18     |
| GE         | y             | 14    | 12     | 13      | 16      | 23     | 11     | 13     | 13     | 18     |
| GE         | y             | 14    | 12     | 13      | 16      | 24     | 11     | 13     | 13     | 19     |
| GE         | y             | 14    | 12     | 13      | 15      | 23     | 11     | 13     | 13     | 19     |
| GE         | y             | 14    | 12     | 13      | 16      | 23     | 11     | 12     | 13     | 20     |
| GE         | y             | 15    | 12     | 13      | 17      | 24     | 10     | 14     | 13     | 20     |
| GE         | y             | 14    | 12     | 13      | 16      | 24     | 11     | 14     | 13     | 19     |
| GE         | y             | 14    | 12     | 13      | 16      | 24     | 11     | 13     | 13     | 20     |
| GE         | y             | 15    | 12     | 13      | 17      | 23     | 11     | 13     | 13     | 19     |
| GE         | y             | 14    | 12     | 13      | 15      | 24     | 10     | 13     | 13     | 18     |
| GE         | y             | 14    | 12     | 13      | 16      | 24     | 11     | 13     | 13     | 20     |
| GE         | y             | 14    | 12     | 13      | 16      | 24     | 11     | 13     | 13     | 19     |
| GE         | y             | 14    | 12     | 14      | 16      | 24     | 11     | 13     | 13     | 20     |
| GE         | y             | 14    | 12     | 13      | 16      | 24     | 9      | 13     | 13     | 21     |
| GE         | y             | 14    | 12     | 13      | 16      | 25     | 11     | 13     | 12     | 21     |
| GE         | y             | 14    | 12     | 13      | 16      | 23     | 11     | 13     | 12     | 19     |
| GE         | y             | 14    | 12     | 12      | 16      | 24     | 10     | 13     | 13     | 19     |
| GE         | y             | 14    | 12     | 13      | 15      | 24     | 11     | 14     | 12     | 18     |
| GE         | y             | 14    | 11     | 13      | 16      | 25     | 11     | 13     | 13     | 19     |
| GE         | y             | 14    | 12     | 13      | 16      | 24     | 10     | 14     | 13     | 20     |
| GE         | y             | 14    | 12     | 13      | 17      | 24     | 11     | 13     | 13     | 19     |
| FR4        | y             | 14    | 12     | 13      | 16      | 24     | 11     | 13     | 13     | 18     |
| FR4        | y             | 14    | 12     | 13      | 17      | 24     | 11     | 13     | 13     | 18     |
| FR4        | y             | 14    | 12     | 13      | 16      | 24     | 11     | 13     | 14     | 18     |
| FR4        | y             | 14    | 12     | 13      | 17      | 24     | 11     | 13     | 13     | 18     |
| FR4        | y             | 14    | 12     | 13      | 16      | 24     | 11     | 13     | 13     | 19     |
| FR4        | y             | 14    | 12     | 13      | 16      | 24     | 11     | 13     | 13     | 18     |
| FR4        | y             | 14    | 12     | 14      | 16      | 24     | 11     | 13     | 13     | 18     |
| FR4        | y             | 14    | 12     | 13      | 16      | 24     | 12     | 13     | 13     | 18     |
| FR4        | y             | 14    | 12     | 13      | 17      | 24     | 11     | 13     | 13     | 19     |
| FR4        | y             | 14    | 12     | 14      | 16      | 25     | 11     | 13     | 13     | 19     |
| FR4        | y             | 14    | 12     | 13      | 16      | 23     | 10     | 13     | 13     | 18     |
| FR4        | y             | 15    | 12     | 13      | 16      | 25     | 11     | 13     | 13     | 18     |
| FR4        | y             | 14    | 12     | 12      | 17      | 24     | 10     | 13     | 13     | 19     |
| FR4        | y             | 15    | 12     | 13      | 16      | 25     | 11     | 13     | 13     | 19     |
| FR4        | y             | 14    | 11     | 13      | 16      | 24     | 11     | 14     | 14     | 18     |
| FR4        | y             | 15    | 12     | 13      | 17      | 24     | 10     | 13     | 13     | 18     |
| FR4        | y             | 14    | 12     | 12      | 17      | 24     | 11     | 13     | 13     | 19     |
| FR4        | y             | 14    | 13     | 13      | 15      | 24     | 11     | 13     | 13     | 20     |
| FR4        | y             | 14    | 12     | 13      | 16      | 24     | 12     | 13     | 13     | 18     |
| FR4        | y             | 14    | 12     | 14      | 16      | 24     | 11     | 13     | 13     | 19     |
| FR4        | y             | 14    | 12     | 12      | 16      | 24     | 11     | 13     | 13     | 18     |
| FR4        | y             | 14    | 12     | 13      | 16      | 23     | 11     | 13     | 13     | 18     |
| FR4        | y             | 14    | 12     | 13      | 16      | 24     | 11     | 13     | 13     | 20     |
| FR4        | y             | 14    | 12     | 13      | 16      | 24     | 11     | 13     | 13     | 18     |
| FR4        | y             | 14    | 12     | 13      | 16      | 24     | 11     | 13     | 13     | 18     |
| FR4        | y             | 14    | 12     | 14      | 16      | 24     | 11     | 13     | 13     | 19     |
| FR4        | y             | 14    | 12     | 13      | 16      | 24     | 10     | 13     | 13     | 19     |
| FR4        | y             | 14    | 12     | 13      | 17      | 25     | 10     | 14     | 13     | 18     |
| FR4        | y             | 14    | 12     | 13      | 16      | 24     | 10     | 13     | 13     | 19     |
| FR4        | y             | 14    | 12     | 13      | 16      | 24     | 11     | 13     | 13     | 19     |
| FR4        | y             | 15    | 12     | 13      | 15      | 24     | 10     | 13     | 13     | 19     |
| FR4        | y             | 14    | 12     | 13      | 16      | 23     | 11     | 13     | 13     | 19     |
| FR4        | y             | 15    | 12     | 14      | 16      | 22     | 10     | 13     | 13     | 20     |
| FR4        | y             | 13    | 12     | 13      | 16      | 24     | 11     | 13     | 13     | 19     |
| FR4        | y             | 14    | 12     | 13      | 16      | 25     | 11     | 13     | 13     | 19     |
| FR4        | y             | 14    | 12     | 13      | 16      | 24     | 10     | 13     | 13     | 18     |
| FR4        | y             | 14    | 12     | 13      | 16      | 25     | 11     | 13     | 13     | 18     |
| FR4        | y             | 14    | 12     | 13      | 16      | 24     | 11     | 13     | 13     | 19     |
| FR4        | y             | 14    | 12     | 14      | 16      | 23     | 10     | 13     | 13     | 19     |
| FR4        | y             | 14    | 12     | 13      | 16      | 24     | 11     | 13     | 13     | 20     |
| FR4        | y             | 14    | 12     | 14      | 16      | 23     | 10     | 13     | 13     | 20     |
| FR4        | y             | 15    | 12     | 13      | 16      | 24     | 11     | 13     | 13     | 18     |
| FR4        | y             | 14    | 12     | 13      | 17      | 24     | 12     | 13     | 13     | 20     |
| FR4        | y             | 14    | 12     | 13      | 16      | 23     | 11     | 13     | 13     | 19     |
| FR4        | y             | 14    | 12     | 13      | 17      | 24     | 11     | 13     | 13     | 19     |
| SP5        | y             | 14    | 12     | 13      | 16      | 25     | 11     | 13     | 13     | 18     |
| SP5        | y             | 14    | 12     | 13      | 16      | 24     | 10     | 13     | 13     | 19     |
| SP5        | y             | 13    | 12     | 14      | 16      | 24     | 13     | 13     | 14     | 18     |
| SP5        | y             | 14    | 12     | 12      | 16      | 23     | 11     | 13     | 13     | 19     |
| SP5        | y             | 14    | 12     | 14      | 17      | 24     | 11     | 13     | 13     | 20     |
| SP5        | y             | 14    | 12     | 13      | 15      | 24     | 11     | 13     | 13     | 20     |
| SP5        | y             | 14    | 12     | 14      | 18      | 24     | 11     | 13     | 13     | 20     |
| SP5        | y             | 14    | 12     | 14      | 16      | 23     | 10     | 13     | 13     | 20     |
| SP5        | y             | 14    | 12     | 14      | 16      | 24     | 10     | 12     | 13     | 20     |
| SP5        | y             | 14    | 12     | 13      | 15      | 24     | 11     | 13     | 13     | 20     |
| SP5        | y             | 14    | 12     | 14      | 16      | 23     | 10     | 13     | 13     | 20     |
| SP5        | y             | 14    | 12     | 14      | 17      | 24     | 11     | 12     | 13     | 20     |
| SP5        | y             | 14    | 12     | 13      | 16      | 24     | 10     | 13     | 13     | 19     |
| SP5        | y             | 14    | 12     | 13      | 16      | 24     | 10     | 13     | 12     | 19     |
| SP5        | y             | 14    | 12     | 12      | 16      | 24     | 10     | 14     | 13     | 19     |
| SP5        | y             | 15    | 12     | 14      | 16      | 24     | 10     | 13     | 13     | 20     |
| SP5        | y             | 15    | 12     | 13      | 16      | 24     | 11     | 13     | 12     | 20     |
| SP5        | y             | 14    | 12     | 13      | 17      | 25     | 11     | 13     | 13     | 19     |
| SP5        | y             | 14    | 12     | 13      | 17      | 24     | 10     | 13     | 13     | 19     |
| SP5        | y             | 14    | 12     | 13      | 18      | 24     | 11     | 13     | 13     | 18     |
| SP5        | y             | 15    | 12     | 13      | 16      | 23     | 11     | 13     | 13     | 19     |
| SP5        | y             | 14    | 12     | 14      | 17      | 24     | 11     | 13     | 13     | 18     |
| SP5        | y             | 14    | 12     | 12      | 16      | 23     | 11     | 13     | 13     | 18     |
| SP5        | y             | 14    | 12     | 12      | 16      | 24     | 11     | 13     | 13     | 19     |



Table S1: Haplotype data

| Population | All analyses? | DYS19 | DYS388 | DYS389I | DYS389b | DYS390 | DYS391 | DYS392 | DYS393 | DYS439 |
|------------|---------------|-------|--------|---------|---------|--------|--------|--------|--------|--------|
| SP6        | y             | 14    | 12     | 13      | 16      | 24     | 11     | 14     | 14     | 19     |
| SP6        | y             | 13    | 12     | 13      | 16      | 25     | 11     | 13     | 13     | 20     |
| SP6        | y             | 14    | 12     | 13      | 15      | 23     | 12     | 13     | 13     | 18     |
| SP6        | y             | 14    | 12     | 13      | 16      | 24     | 11     | 13     | 13     | 20     |
| SP6        | y             | 14    | 12     | 13      | 17      | 24     | 11     | 13     | 13     | 19     |
| SP6        | y             | 14    | 12     | 13      | 16      | 24     | 11     | 13     | 13     | 18     |
| SP6        | y             | 14    | 12     | 13      | 16      | 24     | 11     | 13     | 12     | 19     |
| SP6        | y             | 14    | 12     | 13      | 14      | 24     | 11     | 13     | 13     | 20     |
| SP6        | y             | 14    | 12     | 13      | 16      | 24     | 11     | 13     | 15     | 19     |
| SP6        | y             | 14    | 12     | 14      | 15      | 24     | 11     | 13     | 13     | 20     |
| SP6        | y             | 15    | 12     | 13      | 16      | 24     | 10     | 13     | 14     | 18     |
| SP6        | y             | 14    | 12     | 12      | 15      | 24     | 10     | 13     | 13     | 18     |
| SP6        | y             | 14    | 12     | 13      | 16      | 24     | 10     | 13     | 13     | 20     |
| SP6        | y             | 14    | 12     | 13      | 16      | 24     | 11     | 13     | 13     | 20     |
| SP6        | y             | 15    | 12     | 13      | 16      | 24     | 11     | 13     | 13     | 19     |
| SP6        | y             | 14    | 12     | 12      | 16      | 24     | 10     | 13     | 13     | 19     |
| SP6        | y             | 14    | 12     | 13      | 16      | 24     | 10     | 13     | 13     | 19     |
| SP6        | y             | 14    | 12     | 13      | 16      | 23     | 12     | 13     | 13     | 20     |
| SP6        | y             | 14    | 12     | 14      | 17      | 24     | 10     | 13     | 14     | 21     |
| SP6        | y             | 14    | 12     | 13      | 16      | 24     | 10     | 13     | 13     | 19     |
| SP6        | y             | 14    | 12     | 15      | 16      | 24     | 11     | 13     | 13     | 21     |
| SP6        | y             | 14    | 12     | 14      | 16      | 23     | 11     | 13     | 13     | 19     |
| SP6        | y             | 14    | 12     | 13      | 17      | 24     | 11     | 14     | 13     | 20     |
| SP6        | y             | 14    | 12     | 13      | 16      | 24     | 10     | 13     | 13     | 18     |
| SP6        | y             | 14    | 12     | 14      | 17      | 23     | 11     | 13     | 13     | 20     |
| SP6        | y             | 14    | 12     | 13      | 16      | 23     | 10     | 13     | 13     | 19     |
| SP6        | y             | 14    | 12     | 13      | 16      | 24     | 11     | 14     | 13     | 19     |
| SP6        | y             | 14    | 12     | 14      | 16      | 24     | 11     | 13     | 13     | 19     |
| SP6        | y             | 14    | 12     | 12      | 16      | 24     | 11     | 13     | 12     | 19     |
| SP6        | y             | 14    | 12     | 13      | 15      | 22     | 10     | 13     | 13     | 18     |
| SP6        | y             | 14    | 12     | 13      | 16      | 25     | 11     | 14     | 13     | 19     |
| SP6        | y             | 14    | 12     | 13      | 15      | 25     | 10     | 13     | 14     | 20     |
| SP6        | y             | 15    | 12     | 13      | 16      | 24     | 11     | 13     | 13     | 19     |
| SP6        | y             | 14    | 12     | 13      | 17      | 24     | 11     | 13     | 13     | 19     |
| SP6        | y             | 14    | 12     | 13      | 16      | 25     | 11     | 13     | 13     | 18     |
| SP6        | y             | 14    | 12     | 12      | 16      | 24     | 11     | 13     | 13     | 20     |
| SP6        | y             | 14    | 12     | 13      | 16      | 24     | 11     | 13     | 13     | 18     |
| SP6        | y             | 14    | 12     | 13      | 16      | 23     | 11     | 13     | 13     | 19     |
| SP2        | y             | 14    | 12     | 13      | 16      | 24     | 10     | 13     | 13     | 19     |
| SP2        | y             | 14    | 12     | 13      | 16      | 24     | 11     | 13     | 13     | 19     |
| SP2        | y             | 14    | 12     | 13      | 16      | 25     | 10     | 13     | 13     | 20     |
| SP2        | y             | 14    | 12     | 12      | 16      | 23     | 11     | 14     | 13     | 18     |
| SP2        | y             | 14    | 12     | 13      | 16      | 24     | 11     | 13     | 13     | 19     |
| SP2        | y             | 14    | 12     | 14      | 16      | 24     | 11     | 13     | 12     | 20     |
| SP2        | y             | 14    | 12     | 12      | 16      | 24     | 11     | 13     | 13     | 19     |
| SP2        | y             | 14    | 12     | 14      | 16      | 24     | 11     | 13     | 13     | 18     |
| SP2        | y             | 14    | 12     | 13      | 16      | 24     | 11     | 13     | 13     | 19     |
| SP2        | y             | 14    | 12     | 13      | 16      | 25     | 10     | 13     | 13     | 20     |
| SP2        | y             | 14    | 13     | 12      | 16      | 24     | 10     | 13     | 13     | 19     |
| SP2        | y             | 14    | 12     | 13      | 16      | 24     | 11     | 13     | 13     | 19     |
| SP2        | y             | 14    | 12     | 13      | 17      | 25     | 11     | 13     | 13     | 19     |
| SP2        | y             | 15    | 12     | 13      | 16      | 23     | 11     | 13     | 13     | 19     |
| SP2        | y             | 14    | 12     | 13      | 16      | 24     | 10     | 13     | 13     | 19     |
| SP2        | y             | 14    | 12     | 13      | 16      | 24     | 11     | 13     | 13     | 19     |
| SP2        | y             | 14    | 12     | 14      | 17      | 24     | 10     | 13     | 13     | 20     |
| SP2        | y             | 14    | 12     | 13      | 16      | 24     | 11     | 13     | 12     | 19     |
| SP2        | y             | 14    | 12     | 13      | 16      | 23     | 10     | 13     | 13     | 19     |
| SP2        | y             | 15    | 12     | 13      | 16      | 24     | 11     | 13     | 13     | 21     |
| SP2        | y             | 14    | 12     | 14      | 17      | 25     | 10     | 13     | 13     | 19     |
| SP2        | y             | 14    | 12     | 13      | 16      | 24     | 10     | 13     | 13     | 19     |
| SP2        | y             | 14    | 12     | 14      | 15      | 24     | 10     | 13     | 13     | 19     |
| SP2        | y             | 15    | 12     | 13      | 16      | 24     | 10     | 13     | 13     | 19     |
| SP2        | y             | 14    | 12     | 13      | 16      | 24     | 11     | 14     | 13     | 19     |
| SP2        | y             | 14    | 12     | 13      | 16      | 24     | 10     | 13     | 13     | 19     |
| SP2        | y             | 14    | 12     | 13      | 18      | 24     | 10     | 13     | 14     | 19     |
| SP2        | y             | 14    | 12     | 12      | 16      | 24     | 11     | 13     | 13     | 19     |
| SP2        | y             | 14    | 12     | 13      | 16      | 24     | 11     | 13     | 13     | 20     |
| SP2        | y             | 14    | 12     | 12      | 16      | 23     | 11     | 13     | 14     | 19     |
| SP2        | y             | 14    | 12     | 14      | 18      | 24     | 11     | 13     | 14     | 18     |
| SP2        | y             | 14    | 12     | 13      | 16      | 24     | 11     | 13     | 13     | 19     |
| SP2        | y             | 14    | 12     | 13      | 16      | 23     | 10     | 13     | 13     | 20     |
| SP2        | y             | 14    | 12     | 13      | 17      | 23     | 10     | 13     | 13     | 19     |
| SP2        | y             | 14    | 12     | 12      | 16      | 24     | 11     | 13     | 13     | 20     |
| SP2        | y             | 14    | 12     | 14      | 17      | 24     | 10     | 13     | 13     | 19     |
| SP2        | y             | 14    | 12     | 13      | 15      | 24     | 11     | 13     | 13     | 18     |
| SP2        | y             | 14    | 12     | 13      | 16      | 25     | 11     | 13     | 13     | 18     |
| SP2        | y             | 14    | 12     | 13      | 16      | 23     | 10     | 13     | 13     | 18     |
| TK3        | y             | 14    | 12     | 13      | 16      | 24     | 11     | 13     | 12     | 20     |
| TK3        | y             | 14    | 12     | 13      | 16      | 24     | 11     | 13     | 12     | 19     |
| TK3        | y             | 14    | 12     | 13      | 16      | 24     | 12     | 13     | 13     | 19     |
| TK3        | y             | 14    | 12     | 13      | 16      | 25     | 11     | 14     | 13     | 18     |
| TK3        | y             | 14    | 12     | 13      | 15      | 24     | 11     | 15     | 12     | 20     |
| TK3        | y             | 15    | 12     | 13      | 16      | 24     | 11     | 13     | 12     | 19     |
| TK3        | y             | 14    | 12     | 13      | 16      | 21     | 10     | 13     | 12     | 19     |
| TK3        | y             | 14    | 12     | 13      | 16      | 24     | 11     | 13     | 13     | 19     |
| TK3        | y             | 13    | 12     | 13      | 17      | 25     | 11     | 13     | 12     | 19     |
| TK3        | y             | 14    | 12     | 13      | 16      | 23     | 10     | 13     | 12     | 19     |
| TK3        | y             | 14    | 12     | 13      | 18      | 24     | 10     | 13     | 12     | 18     |
| TK3        | y             | 14    | 12     | 12      | 16      | 24     | 11     | 13     | 14     | 18     |
| TK3        | y             | 14    | 12     | 13      | 16      | 24     | 11     | 13     | 13     | 18     |
| TK3        | y             | 14    | 12     | 13      | 15      | 24     | 11     | 14     | 12     | 19     |
| TK3        | y             | 14    | 12     | 13      | 16      | 24     | 11     | 15     | 13     | 19     |
| TK3        | y             | 14    | 12     | 13      | 15      | 24     | 11     | 14     | 12     | 20     |
| TK3        | y             | 13    | 12     | 13      | 18      | 25     | 11     | 13     | 12     | 18     |
| TK3        | y             | 14    | 12     | 13      | 16      | 25     | 11     | 13     | 12     | 19     |
| TK3        | y             | 14    | 12     | 13      | 15      | 23     | 10     | 14     | 12     | 19     |
| TK3        | y             | 14    | 12     | 13      | 16      | 24     | 11     | 13     | 13     | 19     |



Table S1: Haplotype data

| Population | All analyses? | DYS19 | DYS388 | DYS389I | DYS389b | DYS390 | DYS391 | DYS392 | DYS393 | DYS439 |
|------------|---------------|-------|--------|---------|---------|--------|--------|--------|--------|--------|
| TK3        | y             | 14    | 13     | 14      | 16      | 23     | 10     | 13     | 12     | 18     |
| TK3        | y             | 14    | 12     | 13      | 15      | 24     | 11     | 14     | 12     | 19     |
| TK1        | y             | 14    | 12     | 14      | 16      | 24     | 10     | 13     | 12     | 20     |
| TK1        | y             | 14    | 12     | 13      | 15      | 23     | 11     | 13     | 13     | 19     |
| TK1        | y             | 14    | 12     | 13      | 15      | 24     | 10     | 14     | 12     | 20     |
| TK1        | y             | 14    | 12     | 13      | 16      | 24     | 10     | 13     | 12     | 20     |
| TK1        | y             | 14    | 12     | 12      | 16      | 25     | 11     | 13     | 12     | 20     |
| TK1        | y             | 14    | 12     | 14      | 17      | 25     | 10     | 13     | 12     | 19     |
| TK1        | y             | 14    | 12     | 13      | 16      | 24     | 11     | 13     | 12     | 20     |
| TK1        | y             | 14    | 12     | 14      | 17      | 23     | 10     | 13     | 12     | 19     |
| TK1        | y             | 14    | 12     | 14      | 16      | 24     | 11     | 13     | 13     | 18     |
| TK1        | y             | 14    | 12     | 13      | 16      | 24     | 11     | 13     | 12     | 19     |
| TK1        | y             | 14    | 12     | 14      | 16      | 24     | 11     | 13     | 13     | 18     |
| TK1        | y             | 14    | 12     | 13      | 16      | 24     | 11     | 13     | 13     | 19     |
| TK1        | y             | 14    | 12     | 13      | 16      | 25     | 11     | 13     | 12     | 18     |
| TK1        | y             | 15    | 12     | 12      | 17      | 24     | 10     | 13     | 13     | 20     |
| TK1        | y             | 15    | 12     | 14      | 15      | 25     | 10     | 12     | 12     | 18     |
| TK1        | y             | 14    | 12     | 13      | 16      | 24     | 11     | 13     | 12     | 19     |
| TK1        | y             | 15    | 12     | 13      | 16      | 21     | 10     | 13     | 12     | 19     |
| TK1        | y             | 14    | 12     | 13      | 17      | 25     | 10     | 13     | 12     | 19     |
| TK1        | y             | 14    | 12     | 13      | 16      | 24     | 11     | 13     | 14     | 19     |
| TK1        | y             | 15    | 12     | 12      | 15      | 23     | 10     | 14     | 12     | 19     |
| TK1        | y             | 14    | 12     | 13      | 16      | 24     | 11     | 13     | 12     | 19     |
| TK1        | y             | 14    | 12     | 14      | 16      | 24     | 11     | 13     | 12     | 18     |
| TK1        | y             | 14    | 12     | 14      | 16      | 24     | 11     | 12     | 12     | 18     |
| TK1        | y             | 14    | 12     | 13      | 16      | 24     | 10     | 14     | 12     | 20     |
| TK1        | y             | 15    | 12     | 13      | 16      | 23     | 11     | 13     | 12     | 19     |
| TK1        | y             | 14    | 12     | 13      | 16      | 24     | 10     | 12     | 12     | 19     |
| TK1        | y             | 14    | 12     | 13      | 16      | 23     | 10     | 13     | 12     | 19     |
| TK1        | y             | 14    | 12     | 13      | 15      | 24     | 10     | 14     | 12     | 18     |
| TK1        | y             | 14    | 12     | 13      | 15      | 24     | 11     | 14     | 12     | 20     |
| TK2        | y             | 14    | 12     | 13      | 16      | 25     | 10     | 13     | 12     | 20     |
| TK2        | y             | 14    | 12     | 13      | 15      | 24     | 10     | 15     | 12     | 19     |
| TK2        | y             | 14    | 12     | 13      | 16      | 24     | 10     | 13     | 12     | 19     |
| TK2        | y             | 14    | 12     | 12      | 15      | 24     | 10     | 14     | 12     | 19     |
| TK2        | y             | 13    | 12     | 13      | 17      | 24     | 11     | 13     | 12     | 21     |
| TK2        | y             | 14    | 12     | 12      | 16      | 24     | 11     | 13     | 13     | 21     |
| TK2        | y             | 14    | 12     | 12      | 16      | 24     | 11     | 13     | 13     | 21     |
| TK2        | y             | 14    | 12     | 13      | 16      | 23     | 11     | 13     | 12     | 18     |
| TK2        | y             | 14    | 12     | 13      | 16      | 24     | 11     | 13     | 13     | 19     |
| TK2        | y             | 14    | 12     | 13      | 16      | 24     | 11     | 13     | 12     | 19     |
| TK2        | y             | 13    | 12     | 13      | 16      | 25     | 11     | 13     | 12     | 19     |
| TK2        | y             | 14    | 12     | 13      | 16      | 24     | 11     | 13     | 12     | 19     |
| TK2        | y             | 14    | 12     | 13      | 16      | 24     | 11     | 13     | 12     | 20     |
| TK2        | y             | 14    | 12     | 13      | 16      | 24     | 11     | 13     | 12     | 20     |
| TK2        | y             | 14    | 12     | 13      | 16      | 24     | 11     | 13     | 12     | 20     |
| TK2        | y             | 14    | 12     | 13      | 16      | 24     | 11     | 13     | 12     | 18     |
| TK2        | y             | 14    | 12     | 13      | 16      | 24     | 11     | 13     | 12     | 19     |
| TK2        | y             | 14    | 12     | 13      | 15      | 23     | 11     | 11     | 12     | 19     |
| TK2        | y             | 14    | 12     | 13      | 16      | 24     | 10     | 13     | 12     | 19     |
| TK2        | y             | 15    | 12     | 12      | 15      | 24     | 10     | 13     | 12     | 18     |
| TK2        | y             | 14    | 12     | 13      | 16      | 25     | 11     | 13     | 12     | 18     |
| TK2        | y             | 14    | 12     | 12      | 15      | 24     | 10     | 14     | 12     | 19     |
| TK2        | y             | 14    | 12     | 13      | 16      | 25     | 11     | 13     | 12     | 18     |
| TK2        | y             | 14    | 12     | 12      | 15      | 24     | 10     | 14     | 12     | 19     |
| TK2        | y             | 14    | 12     | 13      | 16      | 25     | 11     | 13     | 12     | 18     |
| TK2        | y             | 14    | 12     | 12      | 15      | 24     | 10     | 14     | 12     | 19     |
| TK2        | y             | 14    | 12     | 13      | 16      | 24     | 10     | 13     | 12     | 19     |
| TK2        | y             | 14    | 12     | 13      | 16      | 24     | 10     | 13     | 12     | 19     |
| SB         |               | 14    | 12     | 13      | 16      | 24     | 11     | 13     | 13     | 20     |
| SB         |               | 14    | 12     | 13      | 16      | 24     | 11     | 13     | 12     | 19     |
| SB         |               | 14    | 12     | 13      | 16      | 24     | 11     | 13     | 13     | 19     |
| SB         |               | 15    | 12     | 13      | 16      | 24     | 11     | 13     | 12     | 19     |
| SB         |               | 14    | 12     | 13      | 16      | 24     | 10     | 13     | 13     | 18     |
| SB         |               | 14    | 12     | 13      | 16      | 24     | 11     | 13     | 13     | 19     |
| SB         |               | 14    | 12     | 13      | 16      | 23     | 11     | 13     | 13     | 21     |
| GR         |               | 15    | 12     | 13      | 16      | 24     | 11     | 13     | 13     | 17     |
| GR         |               | 14    | 12     | 13      | 16      | 23     | 11     | 14     | 13     | 19     |

Population abbreviations are as in Table 1; for each microsatellite (DYS19 - DYS439) repeat unit numbers are given.
